# Supplementary material
Source: MDPI journal article supplement (https://www.mdpi.com/1999-4907/13/12/2024)
Supplement: s1 [file s1]

# Supplementary Materials

## Title: Chemical Composition and Deposition Characteristics of Precipitation into a Typical Temperate Forest in Northeast China

Yingying Wang <sup>1,2</sup>, Feifei Zhu <sup>1,3,4</sup>, Ronghua Kang <sup>1,4,5</sup>, Linlin Song <sup>1,3,4</sup>, Shaonan Huang <sup>6</sup>, Dan Huang <sup>1,4</sup>, Kai Huang <sup>1,2</sup>, Abubakari Said Mgelwa <sup>1,7</sup>, Geshere Abdisa Gurmessa <sup>1,4</sup>, Xiaoming Fang <sup>1,3,4</sup>, and Yunting Fang <sup>1,4, \*</sup>

- <sup>1</sup> CAS Key Laboratory of Forest Ecology and Management, Institute of Applied Ecology, Chinese Academy of Sciences, Shenyang, Liaoning 110016, China
- <sup>2</sup> University of Chinese Academy of Sciences, Beijing 100049, China
- <sup>3</sup> Qingyuan Forest CERN, National Observation and Research Station, Shenyang, Liaoning 110016, China
- <sup>4</sup> Key Laboratory of Stable Isotope Techniques and Applications, Shenyang, Liaoning 110016, China
- <sup>5</sup> Weifang Academy of Modern Agriculture and Ecological Environment, Weifang, Shandong 261000, China
- <sup>6</sup> Key Laboratory of Geospatial Technology for the Middle and Lower Yellow River Regions, Ministry of Education, College of Geography and Environment Science, Henan University, Kaifeng, 475004, China
- <sup>7</sup> College of Natural Resources Management & Tourism, Mwalimu Julius K. Nyerere University of Agriculture & Technology, P.O. Box 976 Musoma, Tanzania
- \* Correspondence: [fangyt@iae.ac.cn](mailto:fangyt@iae.ac.cn) (Y. F.)

## Supplementary Material Contents:

In total 7 pages including: Figures S1 to S5 (Pages 2-6) and Table S1 (Page7).

## Supplementary Figures

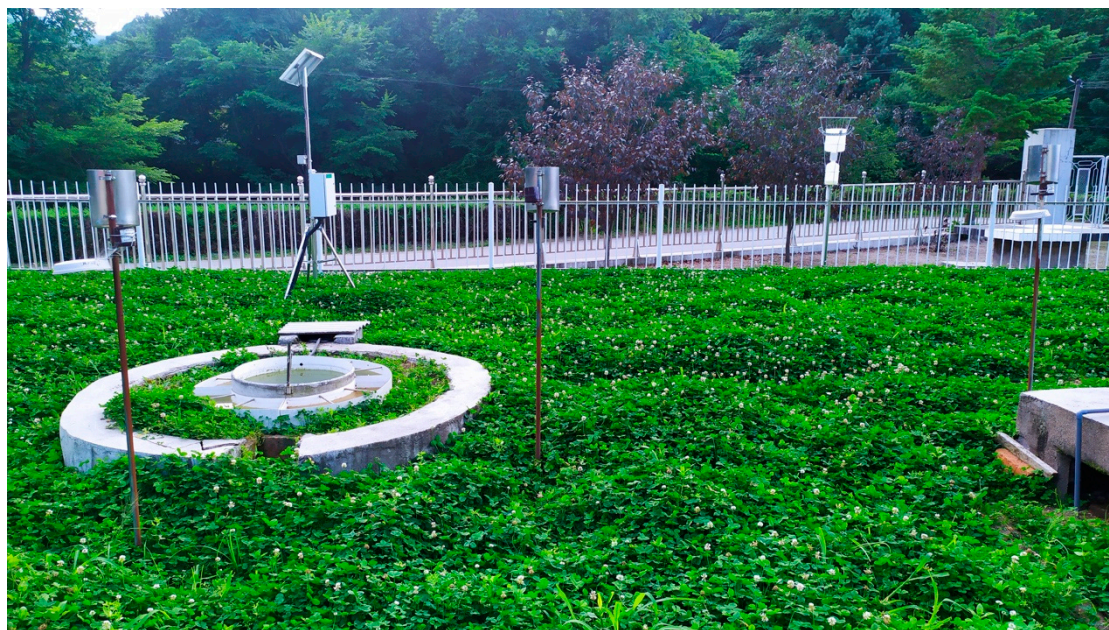

**Figure S1:** Bulk deposition samplers in Qingyuan rural sites. (Li Z.J. et al. 2020, [39])

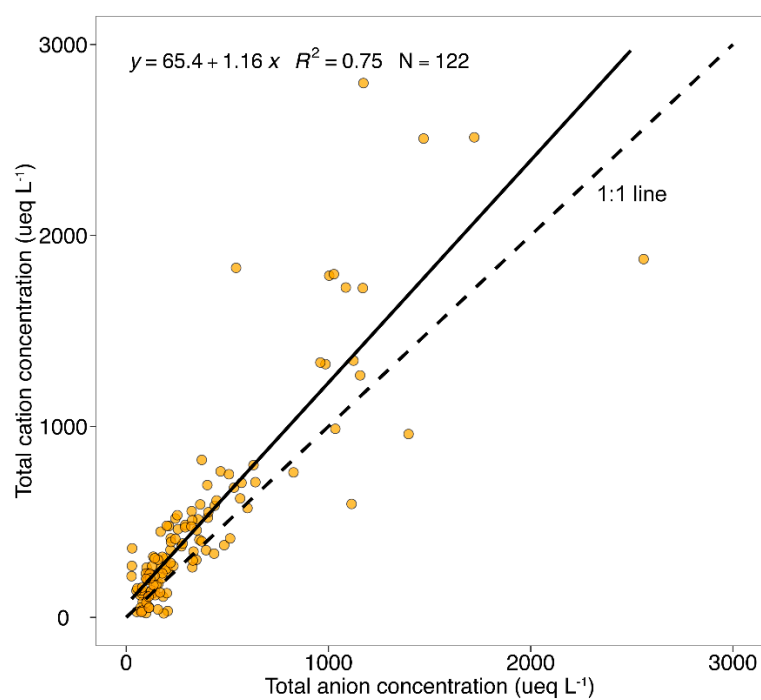

**Figure S2:** The correlation between total anion and cation concentrations in precipitation in the Qingyuan forests over the study period from 2018 to 2020.

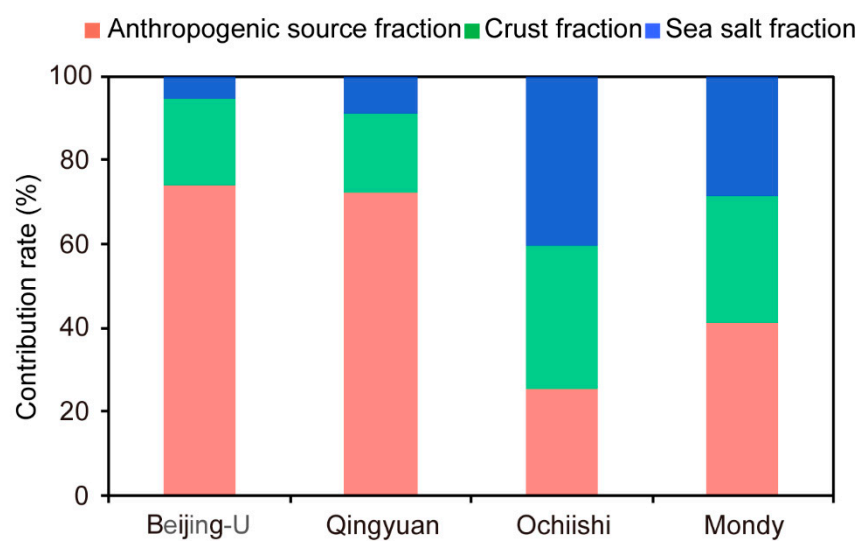

**Figure S3:** Contribution of each source to total ions in precipitation in the Qingyuan forest over the study period, compared to Beijing, Mondy, and Ochiishi.

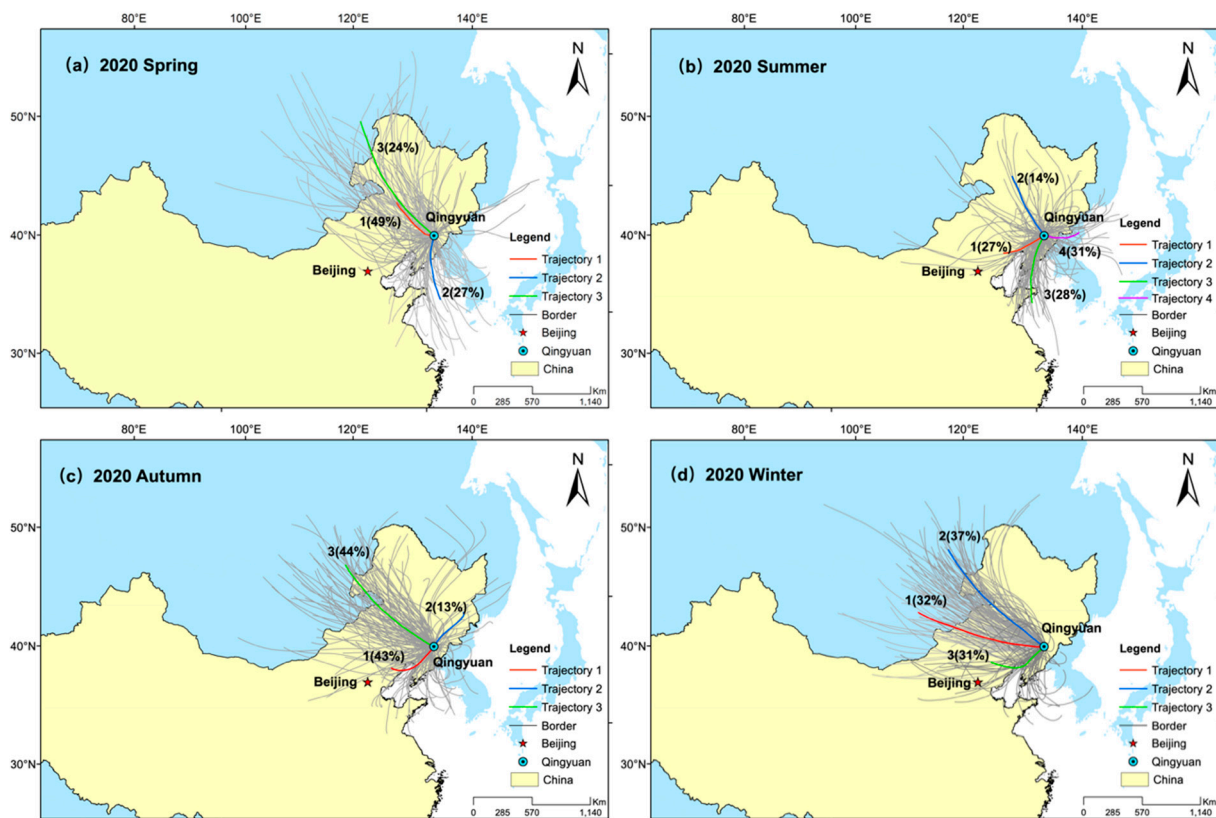

**Figure S4:** 500 m above ground level air mass backward trajectory analysis for the year 2020 from the NOAA HYSPLIT model. The blue circle indicates our study site (the Qingyuan station). The red star indicates Beijing. The grey lines represent the 72-hour backward trajectories of all air masses in each season (spring, summer, autumn, winter) that end in a trajectory at this study site. Spring from March to May, summer from June to August, autumn from September to November and winter from December to February. The red, blue, and green lines show the sources of water vapour in different directions.

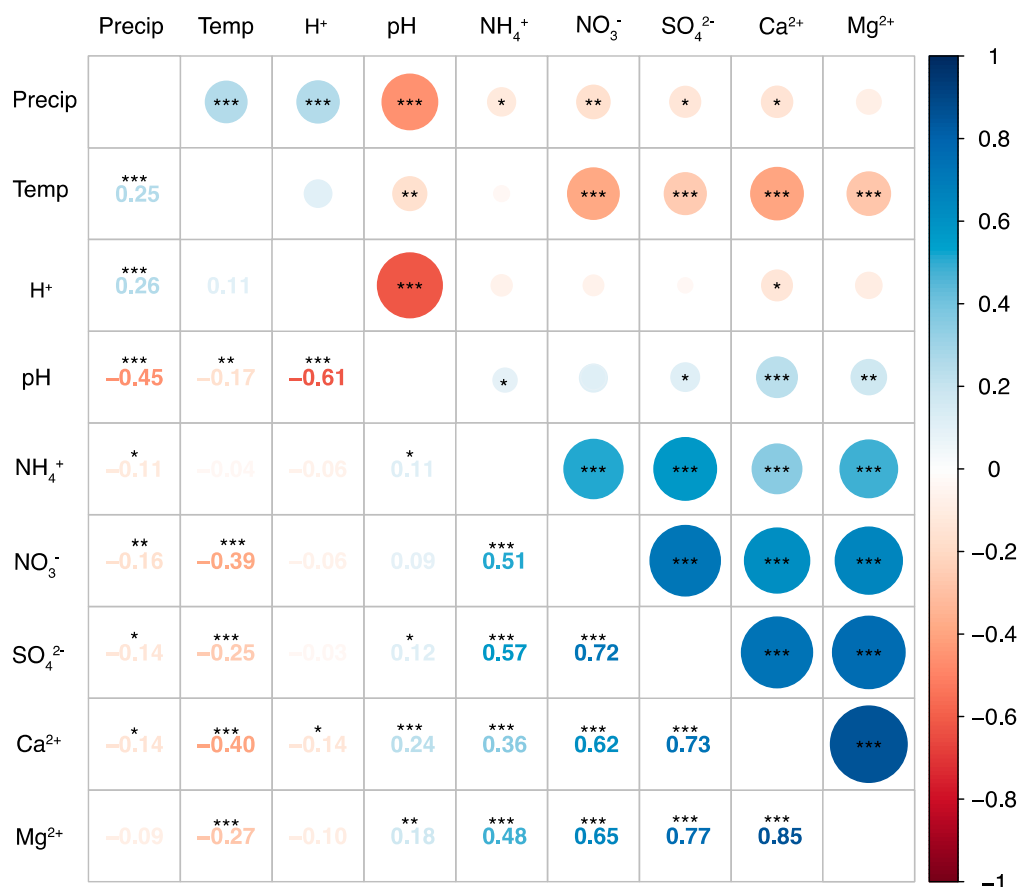

**Figure S5:** Correlation of concentrations of major ions in precipitation at the Qingyuan station: blue indicates a positive correlation, red indicates a negative correlation, and the number is the correlation coefficient in the ellipse. \*\* indicates a significant correlation at the 0.05 level (two-sided), \*\*\* indicates a significant correlation at the 0.01 level (two-sided).

## Supplementary Table

**Table S1:** To calculate the different sources of ions in Qingyuan precipitation, the reference values for the ratio of  $[X/Na^+]_{seawater}$  and  $[X/Ca^{2+}]_{soil}$  in Equations (3) to (5) were used to calculate the relative contributions of the sea salt fraction (*SSF*), crust fraction (*CF*), and anthropogenic source fraction (*AF*).

| ions                          | $[X/Na^+]_{seawater}$ | $[X/Ca^{2+}]_{soil}$ |
|-------------------------------|-----------------------|----------------------|
| SO <sub>4</sub> <sup>2-</sup> | 0.121                 | 0.019                |
| NO <sub>3</sub> <sup>-</sup>  | —                     | 0.002                |
| Cl <sup>-</sup>               | 1.160                 | 0.561                |
| Na <sup>+</sup>               | —                     | 0.504                |
| K <sup>+</sup>                | 0.022                 | 0.003                |
| Ca <sup>2+</sup>              | 0.044                 | —                    |

Data refer to the existing literature Keene et al., (1986) [43] and Taylor, (1964) [44], respectively.
